# Supplementary material
Source: publisher figshare collection journal article supplement (https://asha.figshare.com/articles/dataset/_/6024428)

P1

RATING SCALE PROFILE OF SPEECH CHARACTERISTICS

ARTICULATORY AGILITY

facility at phoneme and syllable level

PHRASE LENGTH

longest occasional uninterrupted word runs

GRAMMATICAL FORM

variety of grammatical constructions;  
use of grammatical morphemes

MELODIC LINE (PROSODY)

PARAPHASIA IN RUNNING SPEECH

(Rate only if PHRASE LENGTH is 4 or more)

WORD FINDING RELATIVE TO FLUENCY

SENTENCE REPETITION

Percentile Score

AUDITORY COMPREHENSION

Mean percentile of the 3 standard subtests

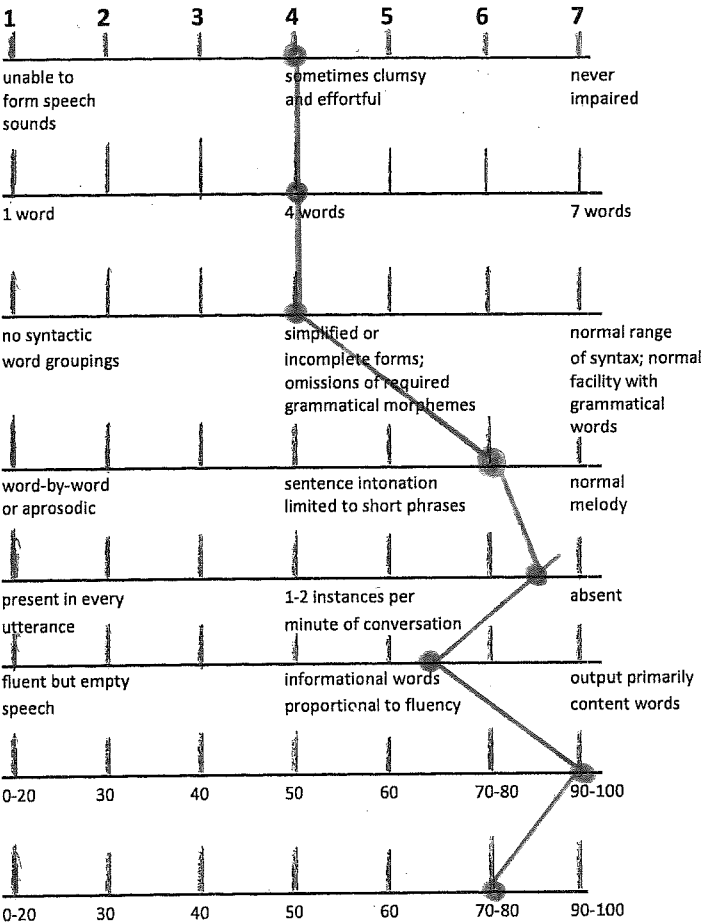

## RATING SCALE PROFILE OF SPEECH CHARACTERISTICS

P2

### ARTICULATORY AGILITY

facility at phoneme and syllable level

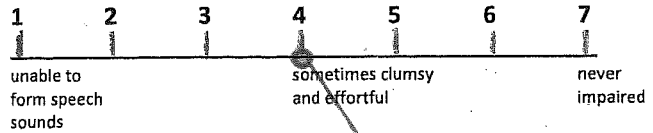

### PHRASE LENGTH

longest occasional uninterrupted word runs

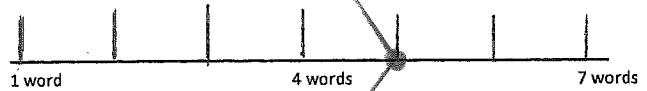

### GRAMMATICAL FORM

variety of grammatical constructions;  
use of grammatical morphemes

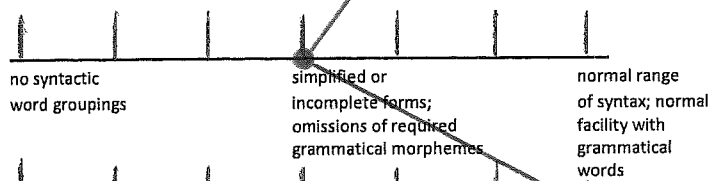

### MELODIC LINE (PROSODY)

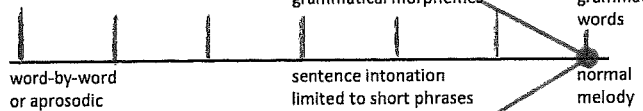

### PARAPHASIA IN RUNNING SPEECH

(Rate only if PHRASE LENGTH is 4 or more)

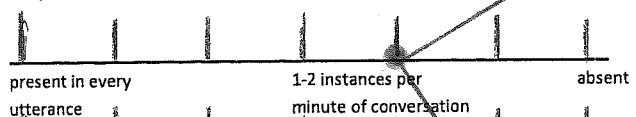

### WORD FINDING RELATIVE TO FLUENCY

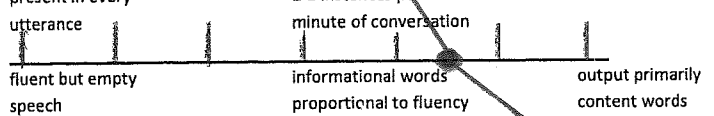

### SENTENCE REPETITION

Percentile Score

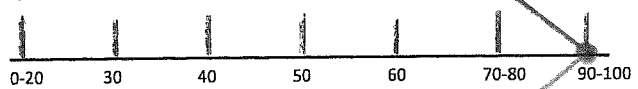

### AUDITORY COMPREHENSION

Mean percentile of the 3 standard subtests

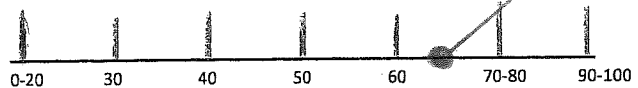

# RATING SCALE PROFILE OF SPEECH CHARACTERISTICS

## ARTICULATORY AGILITY

facility at phoneme and syllable level

## PHRASE LENGTH

longest occasional uninterrupted word runs

## GRAMMATICAL FORM

variety of grammatical constructions;  
use of grammatical morphemes

## MELODIC LINE (PROSODY)

## PARAPHASIA IN RUNNING SPEECH

(Rate only if PHRASE LENGTH is 4 or more)

## WORD FINDING RELATIVE TO FLUENCY

## SENTENCE REPETITION

Percentile Score

## AUDITORY COMPREHENSION

Mean percentile of the 3 standard subtests

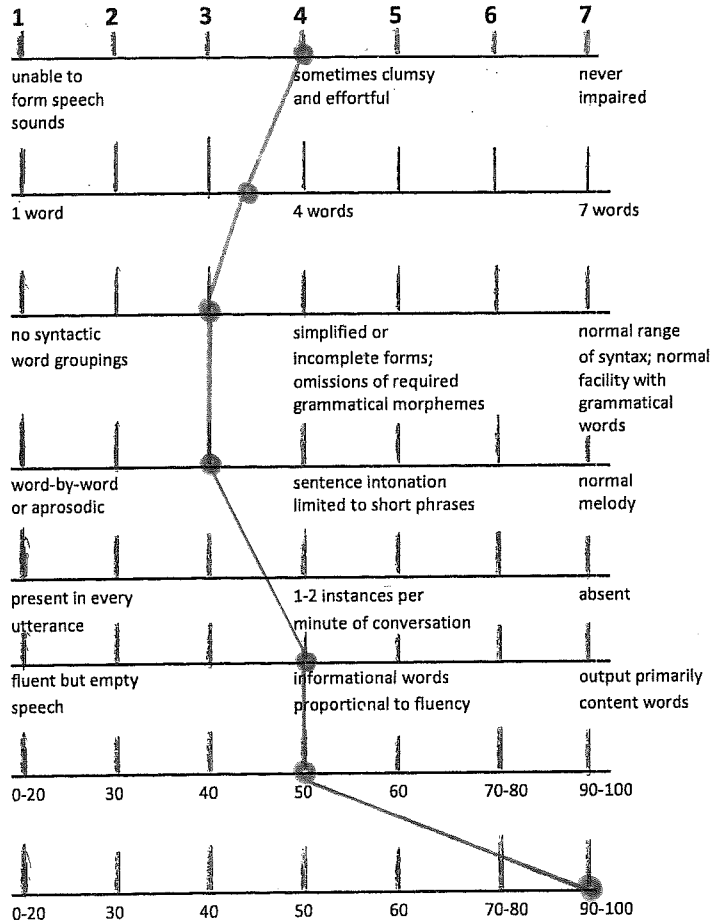

# RATING SCALE PROFILE OF SPEECH CHARACTERISTICS

P4

## ARTICULATORY AGILITY

facility at phoneme and syllable level

## PHRASE LENGTH

longest occasional uninterrupted word runs

## GRAMMATICAL FORM

variety of grammatical constructions;  
use of grammatical morphemes

## MELODIC LINE (PROSODY)

## PARAPHASIA IN RUNNING SPEECH

(Rate only if PHRASE LENGTH is 4 or more)

## WORD FINDING RELATIVE TO FLUENCY

## SENTENCE REPETITION

Percentile Score

## AUDITORY COMPREHENSION

Mean percentile of the 3 standard subtests

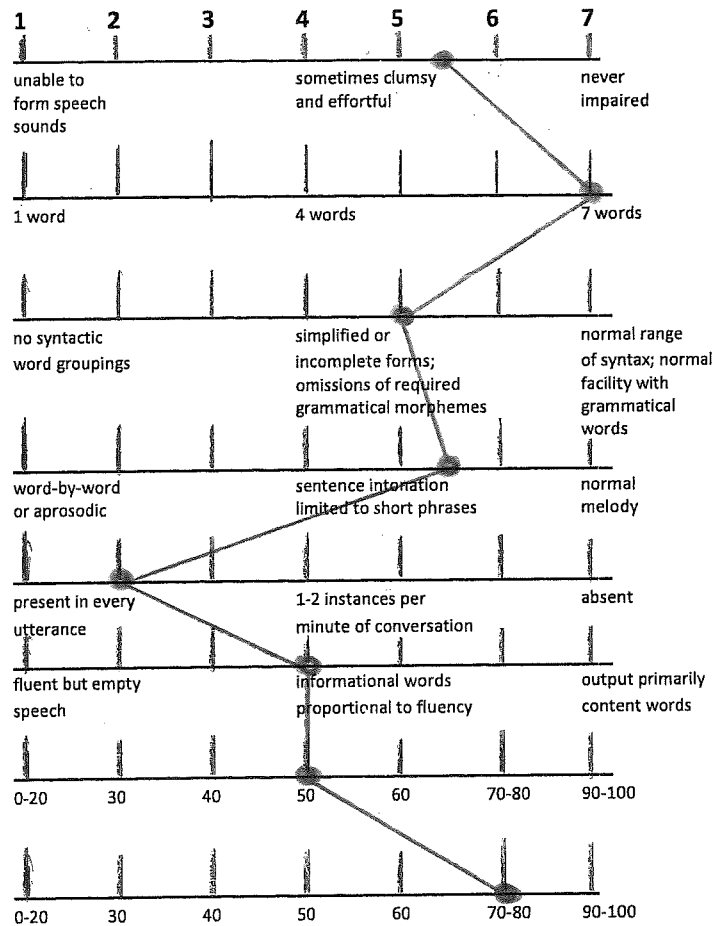

# RATING SCALE PROFILE OF SPEECH CHARACTERISTICS

P5

## ARTICULATORY AGILITY

facility at phoneme and syllable level

## PHRASE LENGTH

longest occasional uninterrupted word runs

## GRAMMATICAL FORM

variety of grammatical constructions;  
use of grammatical morphemes

## MELODIC LINE (PROSODY)

## PARAPHASIA IN RUNNING SPEECH

(Rate only if PHRASE LENGTH is 4 or more)

## WORD FINDING RELATIVE TO FLUENCY

## SENTENCE REPETITION

Percentile Score

## AUDITORY COMPREHENSION

Mean percentile of the 3 standard subtests

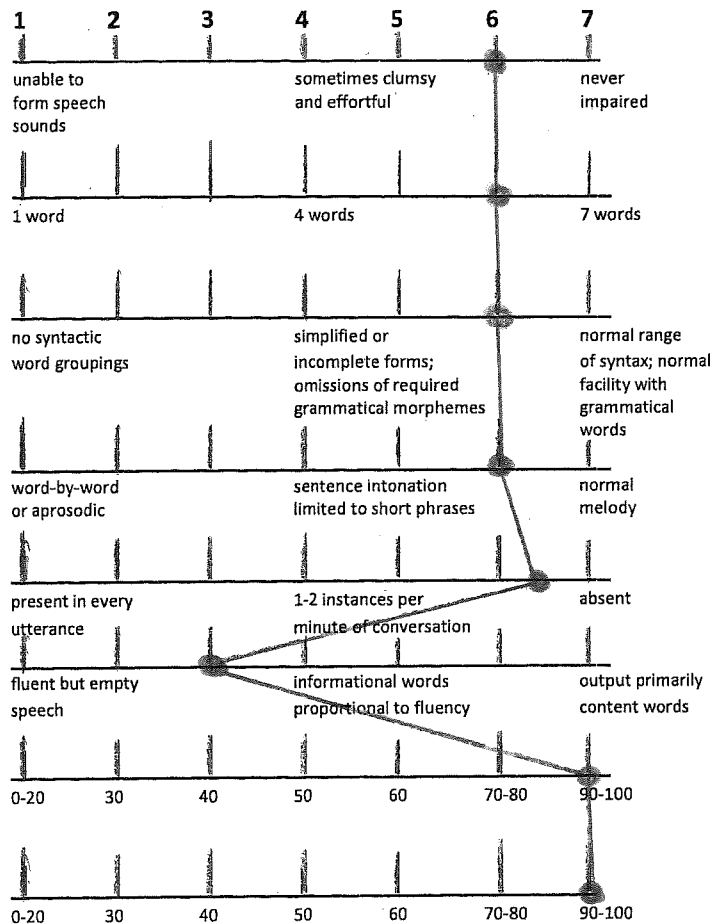

# RATING SCALE PROFILE OF SPEECH CHARACTERISTICS

## ARTICULATORY AGILITY

facility at phoneme and syllable level

## PHRASE LENGTH

longest occasional uninterrupted word runs

## GRAMMATICAL FORM

variety of grammatical constructions;  
use of grammatical morphemes

## MELODIC LINE (PROSODY)

## PARAPHASIA IN RUNNING SPEECH

(Rate only if PHRASE LENGTH is 4 or more)

## WORD FINDING RELATIVE TO FLUENCY

## SENTENCE REPETITION

Percentile Score

## AUDITORY COMPREHENSION

Mean percentile of the 3 standard subtests

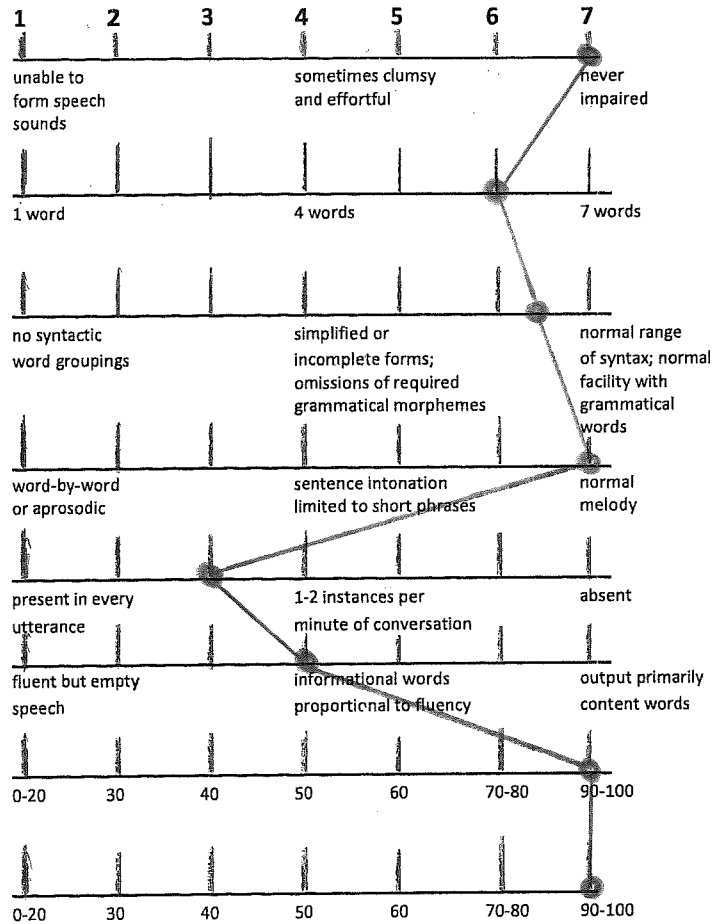

# RATING SCALE PROFILE OF SPEECH CHARACTERISTICS

P7

## ARTICULATORY AGILITY

facility at phoneme and syllable level

## PHRASE LENGTH

longest occasional uninterrupted word runs

## GRAMMATICAL FORM

variety of grammatical constructions;  
use of grammatical morphemes

## MELODIC LINE (PROSODY)

## PARAPHASIA IN RUNNING SPEECH

(Rate only if PHRASE LENGTH is 4 or more)

## WORD FINDING RELATIVE TO FLUENCY

## SENTENCE REPETITION

Percentile Score

## AUDITORY COMPREHENSION

Mean percentile of the 3 standard subtests

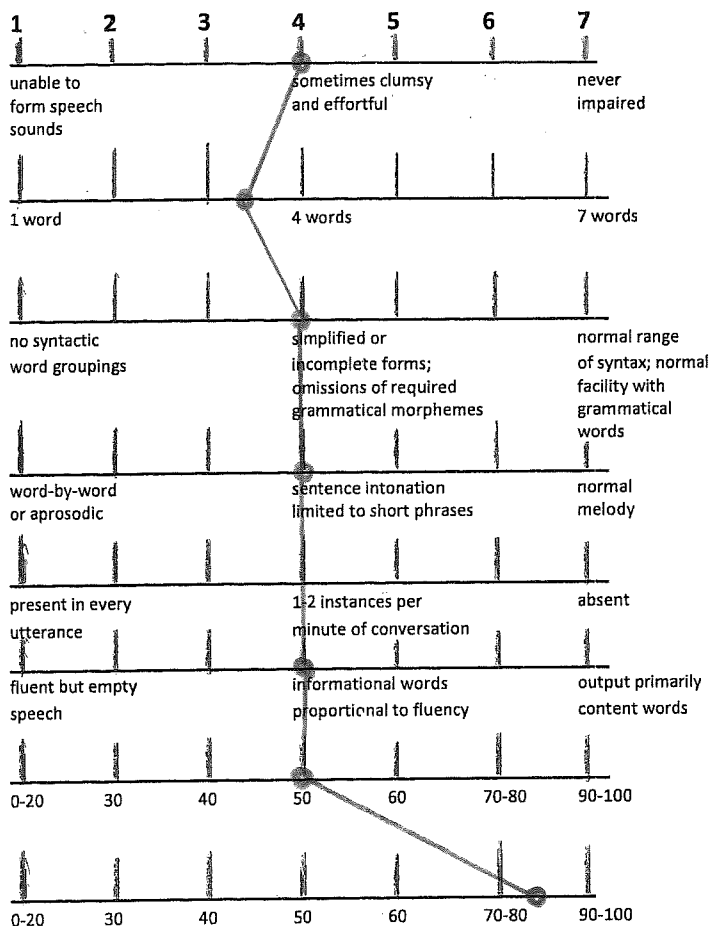

# RATING SCALE PROFILE OF SPEECH CHARACTERISTICS

P8

## ARTICULATORY AGILITY

facility at phoneme and syllable level

## PHRASE LENGTH

longest occasional uninterrupted word runs

## GRAMMATICAL FORM

variety of grammatical constructions;  
use of grammatical morphemes

## MELODIC LINE (PROSODY)

## PARAPHASIA IN RUNNING SPEECH

(Rate only if PHRASE LENGTH is 4 or more)

## WORD FINDING RELATIVE TO FLUENCY

## SENTENCE REPETITION

Percentile Score

## AUDITORY COMPREHENSION

Mean percentile of the 3 standard subtests

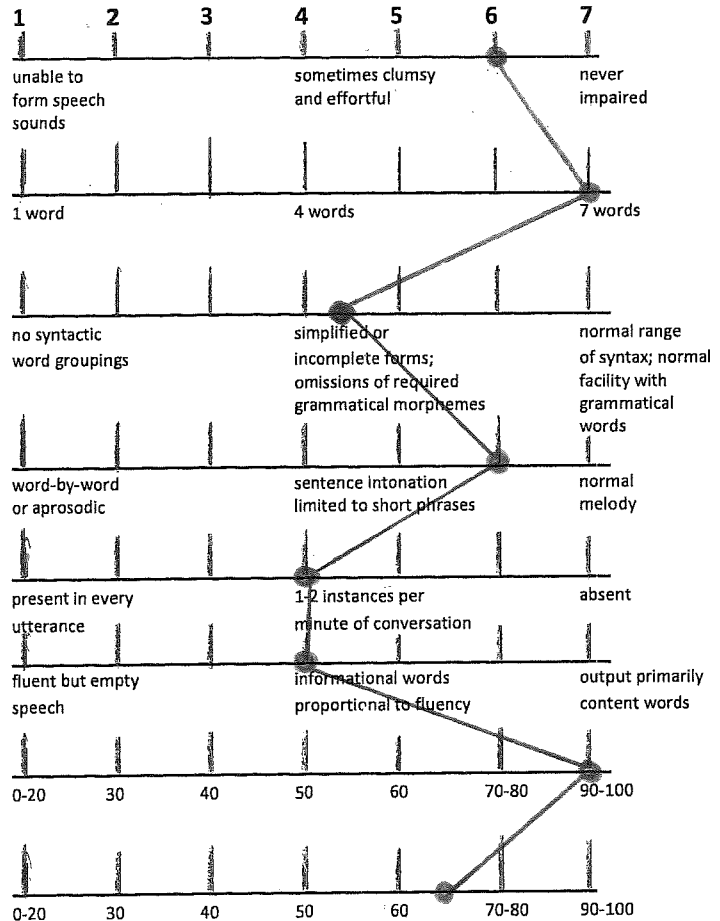

Supplement: Supplementary file 1 [file 1]
