# Supplementary material
Source: publisher figshare collection journal article supplement (https://asha.figshare.com/articles/dataset/_/6024428)
Supplement: Supplementary file 2 [file 1]

**Supplemental Material S7.** Individual performance (correct) of healthy participants on subject-verb agreement, tense, and aspect (with local and nonlocal conditions collapsed).

| Participant                 | Agreement | Tense | Aspect |
|-----------------------------|-----------|-------|--------|
| <i>Younger (aged 20–39)</i> |           |       |        |
| <i>participants</i>         |           |       |        |
| HP1                         | 64/64     | 64/64 | 64/64  |
| HP2                         | 62/64     | 64/64 | 63/64  |
| HP3                         | 64/64     | 64/64 | 62/64  |
| HP4                         | 64/64     | 64/64 | 64/64  |
| HP5                         | 64/64     | 64/64 | 64/64  |
| HP6                         | 64/64     | 64/64 | 64/64  |
| HP7                         | 64/64     | 64/64 | 64/64  |
| HP8                         | 64/64     | 64/64 | 64/64  |
| HP9                         | 64/64     | 64/64 | 64/64  |
| HP10                        | 64/64     | 64/64 | 63/64  |
| HP11                        | 64/64     | 64/64 | 64/64  |
| HP12                        | 64/64     | 64/64 | 61/64  |
| HP13                        | 64/64     | 64/64 | 63/64  |
| HP14 <sup>1</sup>           | 64/64     | 64/64 | 59/64  |
| HP15                        | 64/64     | 63/64 | 64/64  |
| HP16                        | 64/64     | 64/64 | 64/64  |
| HP17                        | 64/64     | 64/64 | 64/64  |
| HP18                        | 64/64     | 64/64 | 64/64  |
| HP19                        | 64/64     | 64/64 | 64/64  |
| HP20                        | 64/64     | 64/64 | 63/64  |
| HP21                        | 64/64     | 64/64 | 64/64  |
| HP22                        | 64/64     | 64/64 | 62/64  |
| HP23                        | 64/64     | 63/64 | 63/64  |
| HP24                        | 64/64     | 64/64 | 62/64  |
| HP25                        | 63/64     | 64/64 | 63/64  |
| HP26                        | 64/64     | 64/64 | 64/64  |
| HP27                        | 64/64     | 64/64 | 64/64  |
| HP28                        | 64/64     | 64/64 | 64/64  |
| HP29 <sup>1</sup>           | 64/64     | 60/64 | 43/64  |
| HP30                        | 64/64     | 63/64 | 61/64  |
| HP31                        | 64/64     | 64/64 | 60/64  |
| HP32                        | 64/64     | 64/64 | 63/64  |
| HP33                        | 64/64     | 64/64 | 64/64  |
| HP34                        | 64/64     | 64/64 | 64/64  |
| <i>Middle-aged (40–59)</i>  |           |       |        |
| <i>participants</i>         |           |       |        |
| HP35                        | 32/32     | 32/32 | 32/32  |
| HP36 <sup>1</sup>           | 64/64     | 63/64 | 56/64  |
| HP37                        | 64/64     | 64/64 | 62/64  |
| HP38                        | 64/64     | 64/64 | 64/64  |
| HP39                        | 63/64     | 64/64 | 61/64  |

| <b>Participant</b>        | <b>Agreement</b> | <b>Tense</b> | <b>Aspect</b> |
|---------------------------|------------------|--------------|---------------|
| HP40                      | 64/64            | 64/64        | 64/64         |
| HP41 <sup>1</sup>         | 64/64            | 64/64        | 57/64         |
| HP42                      | 64/64            | 64/64        | 61/64         |
| HP43                      | 64/64            | 64/64        | 61/64         |
| HP44                      | 64/64            | 64/64        | 64/64         |
| HP45                      | 64/64            | 64/64        | 64/64         |
| HP46                      | 64/64            | 64/64        | 64/64         |
| HP47                      | 64/64            | 64/64        | 64/64         |
| HP48                      | 64/64            | 64/64        | 64/64         |
| HP49                      | 64/64            | 64/64        | 63/64         |
| HP50                      | 64/64            | 64/64        | 60/64         |
| HP51                      | 32/32            | 32/32        | 32/32         |
| HP52                      | 64/64            | 64/64        | 64/64         |
| HP53 <sup>1</sup>         | 64/64            | 64/64        | 40/64         |
| HP54                      | 64/64            | 64/64        | 64/64         |
| HP55                      | 64/64            | 64/64        | 63/64         |
| HP56                      | 64/64            | 64/64        | 64/64         |
| HP57                      | 64/64            | 64/64        | 63/64         |
| HP58                      | 64/64            | 64/64        | 64/64         |
| HP59 <sup>1</sup>         | 63/64            | 64/64        | 44/64         |
| HP60                      | 64/64            | 64/64        | 64/64         |
| HP61                      | 32/32            | 32/32        | 32/32         |
| HP62                      | 31/32            | 32/32        | 31/32         |
| HP63                      | 64/64            | 64/64        | 60/64         |
| HP64                      | 64/64            | 64/64        | 64/64         |
| HP65 <sup>1</sup>         | 64/64            | 64/64        | 58/64         |
| HP66 <sup>1</sup>         | 63/64            | 64/64        | 57/64         |
| HP67                      | 64/64            | 64/64        | 62/64         |
| HP68                      | 63/64            | 64/64        | 62/64         |
| HP69                      | 32/32            | 32/32        | 32/32         |
| <i>Older (aged 60–86)</i> |                  |              |               |
| <i>participants</i>       |                  |              |               |
| HP70 <sup>3</sup>         | 60/64            | 6/64         | 3/64          |
| HP71 <sup>1</sup>         | 64/64            | 64/64        | 51/64         |
| HP72 <sup>1</sup>         | 62/64            | 58/64        | 29/64         |
| HP73 <sup>2</sup>         | 62/64            | 54/64        | 25/64         |
| HP74 <sup>1</sup>         | 61/64            | 60/64        | 26/64         |
| HP75 <sup>1</sup>         | 59/64            | 54/64        | 29/64         |
| HP76 <sup>2</sup>         | 59/64            | 50/64        | 32/64         |
| HP77 <sup>2</sup>         | 64/64            | 57/64        | 34/64         |
| HP78 <sup>1</sup>         | 63/64            | 64/64        | 40/64         |
| HP79 <sup>3</sup>         | 59/64            | 9/64         | 17/64         |
| HP80 <sup>2</sup>         | 64/64            | 48/64        | 16/64         |
| HP81 <sup>1</sup>         | 63/64            | 62/64        | 42/64         |
| HP82 <sup>1</sup>         | 64/64            | 63/64        | 34/64         |
| HP83 <sup>1</sup>         | 64/64            | 64/64        | 57/64         |
| HP84 <sup>3</sup>         | 63/64            | 43/64        | 45/64         |
| HP85                      | 64/64            | 64/64        | 64/64         |

| <b>Participant</b> | <b>Agreement</b> | <b>Tense</b> | <b>Aspect</b> |
|--------------------|------------------|--------------|---------------|
| HP86 <sup>3</sup>  | 64/64            | 58/64        | 56/64         |
| HP87 <sup>4</sup>  | 64/64            | 63/64        | 58/64         |
| HP88               | 64/64            | 64/64        | 61/64         |
| HP89 <sup>2</sup>  | 58/64            | 43/64        | 16/64         |
| HP90 <sup>2</sup>  | 63/64            | 51/64        | 38/64         |
| HP91               | 64/64            | 64/64        | 64/64         |
| HP92               | 64/64            | 64/64        | 64/64         |
| HP93 <sup>1</sup>  | 64/64            | 64/64        | 58/64         |
| HP94 <sup>1</sup>  | 64/64            | 64/64        | 57/64         |
| HP95 <sup>1</sup>  | 32/32            | 32/32        | 27/32         |
| HP96 <sup>2</sup>  | 58/64            | 21/64        | 6/64          |
| HP97 <sup>2</sup>  | 63/64            | 54/64        | 39/64         |
| HP98               | 64/64            | 64/64        | 63/64         |
| HP99 <sup>1</sup>  | 64/64            | 64/64        | 55/64         |
| HP100 <sup>1</sup> | 56/64            | 55/64        | 35/64         |
| HP101 <sup>1</sup> | 64/64            | 64/64        | 57/64         |
| HP102              | 64/64            | 64/64        | 62/64         |
| HP103              | 64/64            | 64/64        | 63/64         |

*Note.* For all comparisons, Fisher's exact test for count data was employed.

HP = Healthy participant.

<sup>1</sup>Pattern agreement/tense > aspect emerged. <sup>2</sup>Pattern agreement > tense > aspect emerged. <sup>3</sup>Pattern agreement > tense/aspect emerged. <sup>4</sup>Pattern agreement > aspect & agreement = tense & tense = aspect emerged.
